# Supplementary material for: Establishing a clinically applicable frailty phenotype screening tool for aging dogs
Source: Front Vet Sci. 2024 Sep 25;11:1335463. doi: 10.3389/fvets.2024.1335463 (PMC11465091; doi:10.3389/fvets.2024.1335463)
Supplement: Supplementary file 4 [file Table_1.XLSX]

## Sheet: Key
Label	Question or measure	Scoring key
Study ID	Unique ID assigned to each individual study participant
Fraction of Lifespan	Fraction of Lifespan = Lifepan / Age	Lifespan = 13.62 + (0.0702*ht) - (0.01538*wt.) Based on calculation defined in Greer et al., 2007 Height (in) and weight (lb)
Weight Cat	Categorical assignments based on weight groups	Small = dogs weighing < 14.8 kg Med = dogs weighing 14.9 - 24.9kg Large = dogs weighing > 24.9kg
Sex		MI = Intact Male FI = Intact Female MN = Neutered Male FS = Spayed Female
Time to Event	Number of days between Time 0 (date of visit) to Time 1 (6 months or date of death, whichever came first)
BCS	Body condition score	Scale 1 - 9 (1 = underconditioned, 9 = overconditioned)
Appetite Q	My dog now:	1 = Has had an increased appetite compared to 6 months ago 2 = Eats normally - i.e. eats the same type of food, and finishes in the same amount of time compared to 6 months ago 3 = Will still eat regular food but takes longer to finish 4 = Does not want to eat regular food but will still eat treats or people food 5 = Acts interested in food but walks away from the bowl without eating 6 = Cannot b…
Activity Q	My dog now:	1 = Plays and interacts with the family as much as 6 months ago 2 = Will get up to greet me, but is more reluctant to play than 6 months ago 3 = Shows interest when I get home, but will not get up 4 = Does not show any interest in their favorite toy, and will not get up to greet me 5 = Shows no interest in me getting home, and is not interested in any stimuli - i.e. treats or strangers coming int…
Exhaustion Q	How often does your dog rest (stop/ sit down) during exercise?	0 = Never 1 = Hardly ever 2 = Occasionally 3 = Frequently 4 = Very frequently
MCS Epaxial MCS Forelimb MCS Hindlimb	Muscle condition score	0 = No atrophy 1 = Mild atrophy 2 = Moderate atrophy 3 - Severe atrophy
Mobility Sum	Sum of Scores of Q1-Q3 (Range 0 - 7) Q1. On average, how often does your dog experience weakness/ lameness in their limbs while walking? Q2. On average, how frequently does your dog experience stiffness in their limbs while walking? Q3. Does your dog ever make mistakes (scuffing paw, swinging leg outward, crossing limbs, lack of coordinarion between front and hind limbs, skipping steps) while wal…	Q1: 0 = Not at all 1 = Less than 10% of the time 2 = 10-50% of the time 3 = More than 50% of the time Q2: 0 = Not at all 1 = Less than 10% of the time 2 = 10-50% of the time 3 = More than 50% of the time Q3: 0 = No 1 = Yes
Nutrition	Present BCS < 4 OR Appetite Q > 2	0 = Non-Impaired 1 = Impaired
Social Activity	Present if Activity Q > 1	0 = Non-Impaired 1 = Impaired
Exhaustion	Present if Exhaustion Q > 2	0 = Non-Impaired 1 = Impaired
Sarcopenia/ Cachexia	Present is MCS Epaxial > 2	0 = Non-Impaired 1 = Impaired
Mobility	Present if Mobility Sum > 4	0 = Non-Impaired 1 = Impaired
Total Impaired Domains	Sum of the 5 domains When all unknown domains are considered non-impaired	0 = 0 domains impaired 1 = 1 domain impaired 2 = 2 domains impaired 3 = 3 domains impaired 4 = 4 domains impaired 5 = 5 domains impaired
Possible Max Total Impaired Domains	Sum of the 5 domains When all unknown domains are considered impaired	0 = 0 domains impaired 1 = 1 domain impaired 2 = 2 domains impaired 3 = 3 domains impaired 4 = 4 domains impaired 5 = 5 domains impaired
Overall Frailty	Frail if Total Impaired Domains > 1	N = Not frail Y = Frail Left blank if discrepancy between results when using Total Impaired Domains and Possible Max Total Impaired Domains

## Sheet: Population 1 Data (Neuro-aging 
Study ID	Visit #	Age (Yrs)	Fraction of Lifespan	Weight (kg)	Weight Cat	Sex	6 Month Status	Manner of Death	Cause of Death	Time to Event	BCS	Appetite Q	Activity Q	Exhaustion Q	MCS Epaxial	Mobility Sum	Nutrition	Social Activity	Exhaustion	Sarcopenia/ Cachexia	Mobility	Total Impaired Domains	Possible Max Total Impaired Domains	Overall Frailty
G01	1	15	1.23	20.1	Med	FS	Deceased	Euthanasia	Unknown	61	3	3	3	3	3		1	1	1	1		4	5	Y	Pure
G02	1	12	0.94	22.2	Med	MN	Living	N/A	N/A	183	7	2	1	0	1		0	0	0	0		0	1	N	Pure
G02	2	12	0.99	22.4	Med	MN	Living	N/A	N/A	183	6	2	1	1	2.25		0	0	0	0		0	1	N	Pure
G02	3	13	1.04	22	Med	MN	Living	N/A	N/A	183	6	2	1	0	2		0	0	0	0		0	1	N	Pure
G02	4	14	1.09		Med	MN	Living	N/A	N/A	183		2	1		2.25	0	0	0		0	0	0	1	N	Pure
G03	1	9	0.84	33.7	Large	FS	Living	N/A	N/A	183	7	2	1	1	1		0	0	0	0		0	1	N	Pure
G03	2	10	0.91	30	Large	FS	Living	N/A	N/A	183	8	2	1	2	2.25		0	0	0	0		0	1	N	Pure
G03	3	10	0.95	30.5	Large	FS	Living	N/A	N/A	183	7	2	1	1	2		0	0	0	0		0	1	N	Pure
G03	4	11	1	31	Large	FS	Living	N/A	N/A	183	8	2	2	2		5	0	1	0		1	2	3	Y	Pure
G03	5	12	1.04	29.9	Large	FS	Deceased	Euthanasia	Neoplasia	63	7	2	1	3	1.25	5	0	0	1	0	1	2	2	Y	Pure
G04	1	15	1.19	9.9	Small	FS	Living	N/A	N/A	183	5	2	2	3	2		0	1	1	0		2	3	Y	Pure
G04	2	15	1.23	9.1	Small	FS	Living	N/A	N/A	183	7	3	1	3	2.25		1	0	1	0		2	3	Y	Pure
G04	3	17	1.34	8.9	Small	FS	Deceased	Euthanasia	Unknown	113	6	6	3	4			1	1	1			3	5	Y	Pure
G05	1	11	0.9	29.7	Large	MN	Living	N/A	N/A	183	5	2	1	1	1.5		0	0	0	0		0	1	N	Pure
G05	2	11	0.97	31.2	Large	MN	Living	N/A	N/A	183	7	2	1	1	1		0	0	0	0		0	1	N	Pure
G05	3	12	1.02	32.5	Large	MN	Living	N/A	N/A	183	5	2	1		1.75		0	0		0		0	2
G05	4	13	1.07	31.7	Large	MN	Living	N/A	N/A	183	5	2	1		1.75	2	0	0		0	0	0	1	N	Pure
G06	1	11	0.82	10.3	Small	MN	Living	N/A	N/A	183	6	2	1	0	1		0	0	0	0		0	1	N	Pure
G06	2	12	0.87	9.7	Small	MN	Living	N/A	N/A	183	6	2		0	2		0		0	0		0	2
G06	3	12	0.9	9.7	Small	MN	Living	N/A	N/A	183	5	2	1		2		0	0		0		0	2
G06	4	13	0.95	10.5	Small	MN	Living	N/A	N/A	183	7	3	1		2.5	0	1	0			0	1	3
G06	5	13	0.98	10.2	Small	MN	Living	N/A	N/A	183	5	3	1	1	1.75	2	1	0	0	0	0	1	1	N	Pure
G07	1	11	0.94	25.4	Med	FS	Living	N/A	N/A	183	6	2	1	0	1.5		0	0	0	0		0	1	N	Pure
G07	2	12	0.99	24.6	Med	FS	Living	N/A	N/A	183	5	2	1	0	2.5		0	0	0	1		1	2
G07	3	13	1.04	24.2	Med	FS	Living	N/A	N/A	183	5	2	2		2.5		0	1		1		2	4	Y	Pure
G07	4	13	1.09		Med	FS	Living	N/A	N/A	183	5	2	1			6	0	0			1	1	3
G08	1	14	1.34	29.8	Large	FS	Deceased	Natural	Foriegn body airway obstruction	46	5	3	2	2	1.75		1	1	0	0		2	3	Y	Pure
G09	1	11	0.88	9.9	Small	MN	Living	N/A	N/A	183	6	2	1	2	1		0	0	0	0		0	1	N	Pure
G10	1	15	1.12	13	Small	MN	Living	N/A	N/A	183	4	2	2	1	2.5		0	1	0	1		2	3	Y	Pure
G10	2	16	1.18		Small	MN	Living	N/A	N/A	183		3	1	0			1	0	0			1	3
G10	3	16	1.22	11.1	Small	MN	Deceased	Euthanasia	Quality of life	67	2	3	2	3	2.75		1	1	1	1		4	5	Y	Pure
G11	1	10	0.86	27.6	Large	FS	Living	N/A	N/A	183	6	5	1	3	2.5		1	0	1	1		3	4	Y	Mix
G11	2	11	0.91	28.5	Large	FS	Living	N/A	N/A	183	8	2	1	3	0		0	0	1	0		1	2
G11	3	11	0.96	29	Large	FS	Living	N/A	N/A	183	7	2	1		1.5		0	0		0		0	2
G11	4	12	1.01		Large	FS	Deceased	Euthanasia	Neoplasia	145		2	2		1.75	7	0	1		0	1	2	3	Y	Mix
G12	1	13	0.96	8.2	Small	FS	Living	N/A	N/A	183	6	2	2	2	1		0	1	0	0		1	2
G12	2	14	1.02	8.2	Small	FS	Living	N/A	N/A	183	4	3	1	2	1		1	0	0	0		1	2
G12	3	14	1.05		Small	FS	Living	N/A	N/A	183		2	2		2.5	4	0	1		1	0	2	3	Y	Pure
G12	4	15	1.09	7.4	Small	FS	Deceased	Natural	Snake Envenomation	80	4	2	2		2.5	7	0	1		1	1	3	4	Y	Pure
G13	1	11	0.94	28.2	Large	MN	Living	N/A	N/A	183	8	2	1	1	1.5		0	0	0	0		0	1	N	Mix
G13	2	12	1.01	27.7	Large	MN	Living	N/A	N/A	183	5				1		0			0		0	3
G13	3	12	1.05		Large	MN	Living	N/A	N/A	183	6	3	2	2	1.75	5	1	1	0	0	1	3	3	Y	Mix
G13	4	13	1.09	27.6	Large	MN	Living	N/A	N/A	183	6	3	2		2.25	5	1	1		0	1	3	4	Y	Mix
G14	1	14		13.6	Small	FS	Deceased	Euthanasia	Unknown	137	6	5	3	4			1	1	1			3	5	Y	Mix
G15	1	13		29.2	Large	MN	Living	N/A	N/A	183	6	2	1	1	2.75		0	0	0	1		1	2
G15	2	14		31.3	Large	MN	Living	N/A	N/A	183	6	2	2	1	2		0	1	0	0		1	2
G16	1	11	0.91	23.4	Med	FS	Living	N/A	N/A	183	6	2	1	1	1		0	0	0	0		0	1	N	Pure
G17	1	12	0.89	11.1	Small	MN	Living	N/A	N/A	183	6	2	1	3	1.5		0	0	1	0		1	2
G17	2	12	0.93		Small	MN	Living	N/A	N/A	183	7				1		0			0		0	3
G17	3	13	0.98		Small	MN	Deceased	Euthanasia	Chronic kidney disease	109	7	1	1		2.75	5	0	0		1	1	2	3	Y	Pure
G24	1	10	0.73	8	Small	MN	Living	N/A	N/A	183	7		1		1	3	0	0		0	0	0	1	N	Pure
G24	2	10	0.78	7.9	Small	MN	Living	N/A	N/A	183	6		1		2	4	0	0		0	0	0	1	N	Pure
G25	1	11	0.91	22.4	Med	FS	Living	N/A	N/A	183	5		1	2	1.25		0	0	0	0		0	1	N	Pure
G25	2	12	0.95		Med	FS	Living	N/A	N/A	183	5		1			1	0	0			0	0	2
G26	1	11	0.89	17.7	Med	MN	Living	N/A	N/A	183	6	2	1		1		0	0		0		0	2
G26	2	12	0.93	16.1	Med	MN	Living	N/A	N/A	183	7	2	1		1.75	1	0	0		0	0	0	1	N	Mix
G27	1	14	1.08	16.2	Med	FS	Living	N/A	N/A	183	6	2	1		1.5		0	0		0		0	2
G27	2	14	1.12		Med	FS	Living	N/A	N/A	183	4	2	1			3	0	0		0	0	0	1	N	Mix
G28	1	14	1.06	9.4	Small	FS	Living	N/A	N/A	183	6	2	1		1.5	3	0	0		0	0	0	1	N	Pure
G28	2	15	1.1	9.4	Small	FS	Living	N/A	N/A	183	5	2	1			2	0	0			0	0	2
G28	3	15	1.12	9.4	Small	FS	Deceased	Euthanasia	Chronic respiratory disease	117	6	3	1	1		3	1	0	0		0	1	2
G29	1	10	0.9	33.2	Large	FS	Deceased	Euthanasia	Neoplasia	123	6	2	1	2	1.5	5	0	0	0	0	1	1	1	N	Pure
G30	1	11	0.85	19.7	Med	MN	Living	N/A	N/A	183	4	2	1	1	2.25	1	0	0	0	0	0	0	0	N	Pure
G30	2	11	0.89	20	Med	MN	Living	N/A	N/A	183	4	2	1			2	0	0			0	0	2
G31	1	11	0.93	31.6	Large	MN	Living	N/A	N/A	183	4	2	2		2	3	0	1		0	0	1	2
G31	2	12	1.04	31.2	Large	MN	Living	N/A	N/A	183	5	2	2		2.5	3	0	1		1	0	2	3	Y	Pure
G32	1	10	0.84	33.2	Large	MN	Living	N/A	N/A	183	5	2	1		2.25	1	0	0		0	0	0	1	N	Pure
G32	2	10	0.88	35.4	Large	MN	Living	N/A	N/A	183	5			0		5	0		0		1	1	3
G33	1	13	0.98	9.2	Small	FS	Living	N/A	N/A	183		1	1			2	0	0			0	0	2
G33	2	14	1.02	9.2	Small	FS	Living	N/A	N/A	183	5	2	1	1		2	0	0	0		0	0	1	N	Mix
G34	1	12	1.01	26.4	Large	FS	Living	N/A	N/A	183	4	2	1		2.5	2	0	0		1	0	1	2
G35	1	12	0.92	17.8	Med	FS	Living	N/A	N/A	183	4				2.25		0			0		0	3
G36	1	11	0.85	20.6	Med	MN	Living	N/A	N/A	183	3	2	1		1.5	4	1	0		0	0	1	2
G37	1	13	1.13	29.7	Large	FS	Living	N/A	N/A	183	6	1	3		1.25	7	0	1		0	1	2	3	Y	Pure
G38	1	11	0.98	33	Large	FS	Living	N/A	N/A	183	7		1	2	0.5	2	0	0	0	0	0	0	0	N	Mix
G39	1	15	1.2	19	Med	FS	Living	N/A	N/A	183	3	3	2		2.75	6	1	1		1	1	4	5	Y	Mix
G40	1	15	1.21	19.5	Med	FS	Deceased	Euthanasia	Quality of life	120	3	4	2		2.75	7	1	1		1	1	4	5	Y	Mix
G41	1	14	1.25	21	Med	FS	Living	N/A	N/A	183	4	2		1	2.75	3	0		0	1	0	1	2
G42	1	13	1.11	34	Large	MN	Living	N/A	N/A	183	6	2	2		2.25	4	0	1		0	0	1	2
G43	1	13	1.1	25.11	Large	FS	Living	N/A	N/A	183	4	2	1		2.25	5	0	0		0	1	1	2
G44	1	10	1.05	54.1	Large	FS	Living	N/A	N/A	183	4	3	2		2.25	4	1	1		0	0	2	3	Y	Pure
G45	1	11	0.98	36.9	Large	FS	Living	N/A	N/A	183	7	2	1		1.5	0	0	0		0	0	0	1	N	Pure
