# Supplementary material for: Establishing a clinically applicable frailty phenotype screening tool for aging dogs
Source: Front Vet Sci. 2024 Sep 25;11:1335463. doi: 10.3389/fvets.2024.1335463 (PMC11465091; doi:10.3389/fvets.2024.1335463)
Supplement: Supplementary file 5 [file Table_2.XLSX]

## Sheet: Key
Label	Question or measure	Scoring key
Study ID	Unique ID assigned to each individual study participant
5-Fold Grouping	Randomly assigned group for 5-fold cross validation
Weight Cat	Categorical assignments based on weight groups	Small = dogs weighing < 14.8 kg Med = dogs weighing 14.9 - 24.9kg Large = dogs weighing > 24.9kg
Service	Which hospital service the dog was seeing at the time of enrollment	PC = Primary Care IM = Internal Medicine Onc = Medical or Radiation Oncology Cardio = Cardiology Neuro = Neurology Behave = Behavior Rehab = Physiotherapy and Rehabilitation
Sex		MI = Intact Male FI = Intact Female MN = Neutered Male FS = Spayed Female
Time to Event	Number of days between Time 0 (date of visit) to Time 1 (6 months or date of death, whichever came first)
Fraction of Lifespan	Fraction of Lifespan = Lifepan / Age	Lifespan = 13.62 + (0.0702*ht) - (0.01538*wt.) Based on calculation defined in Greer et al., 2007 Height (in) and weight (lb)
BCS	Body condition score	Scale 1 - 9 (1 = underconditioned, 9 = overconditioned)
Body Condition Categorical		1 = BCS of 1-3 (Underconditioned) 2 = BCS of 6-9 (Overconditioned) 3 = BCS of 4-5 (Ideal condition)
Appetite Q	My dog now:	2 = Eats normally - i.e. eats the same type of food, and finishes in the same amount of time compared to 6 months ago 3 = Will still eat regular food but takes longer to finish 4 = Does not want to eat regular food but will still eat treats or people food 5 = Acts interested in food but walks away from the bowl without eating 6 = Cannot be enticed to eat no matter what is offered 7 = Has had an i…
Activity Q	My dog now:	1 = Plays and interacts with the family as much as 6 months ago 2 = Will get up to greet me, but is more reluctant to play than 6 months ago 3 = Shows interest when I get home, but will not get up 4 = Does not show any interest in their favorite toy, and will not get up to greet me 5 = Shows no interest in me getting home, and is not interested in any stimuli - i.e. treats or strangers coming int…
Exhaustion Q	How often does your dog rest (stop/ sit down) during exercise?	0 = Never 1 = Hardly ever 2 = Occasionally 3 = Frequently 4 = Very frequently
MCS Epaxial MCS Forelimb MCS Hindlimb	Muscle condition score	0 = No atrophy 1 = Mild atrophy 2 = Moderate atrophy 3 - Severe atrophy
Mobility Sum	Sum of Scores of Q1-Q3 (Range 0 - 7) Q1. On average, how often does your dog experience weakness/ lameness in their limbs while walking? Q2. On average, how frequently does your dog experience stiffness in their limbs while walking? Q3. Does your dog ever make mistakes (scuffing paw, swinging leg outward, crossing limbs, lack of coordinarion between front and hind limbs, skipping steps) while wal…	Q1: 0 = Not at all 1 = Less than 10% of the time 2 = 10-50% of the time 3 = More than 50% of the time Q2: 0 = Not at all 1 = Less than 10% of the time 2 = 10-50% of the time 3 = More than 50% of the time Q3: 0 = No 1 = Yes
Playfulness Q	Over the past week, how many days has your dog been playful?	Range 0 days to 7 days 0 = no days 7 = everyday
Nutrition	Present if BCS < 4 OR > 5; OR Appetite Q > 2 or < 2	0 = Non-Impaired 1 = Impaired
Social Activity	Present if Playfulness Q < 3	0 = Non-Impaired 1 = Impaired
Exhaustion	Present if Exhaustion Q > 2	0 = Non-Impaired 1 = Impaired
Sarcopenia/ Cachexia	Present if MCS Sum (Epaxial + Forelimb + Hindlimb) > 2	0 = Non-Impaired 1 = Impaired
Mobility	Present if Mobility Sum > 6	0 = Non-Impaired 1 = Impaired
Total Impaired Domains	Sum of the 5 domains	0 = 0 domains impaired 1 = 1 domain impaired 2 = 2 domains impaired 3 = 3 domains impaired 4 = 4 domains impaired 5 = 5 domains impaired
Overall Frailty	Frail if Total Impaired Domains > 2	N = Not frail Y = Frail

## Sheet: Population 2 Data (Frailty Stud
Study ID	5-Fold Grouping	Age (Yrs)	Weight (kg)	Weight Cat	Service	Breed	Sex	6 Month Status	Manner of Death	Cause of Death	Time to Event	BCS	Body Condition Categorical	Appetite Q	Activity Q	Exhaustion Q	MCS Forelimb	MCS Hindlimb	MCS Epaxial	Mobility Sum	Playfulness Q	Sarcopenia/ Cachexia	Exhaustion	Nutrition	Mobility	Social Activity	Total Impaired Domains	Overall Frailty
FS001	3	11	8.5	Small	PC	Pure	MN	Living	N/A	N/A	183	7	2	2	1	3	0	1	0	6	7	0	1	1	0	0	2	N
FS002	4	15	25.9	Large	PC	Mix	FS	Living	N/A	N/A	183	3	1	2	2	3	2	2	2	7	1	1	1	1	1	1	5	Y
FS003	5	13	6.4	Small	PC	Pure	MN	Living	N/A	N/A	183	4	3	4	2	4	1	1	1	5	2	1	1	1	0	1	4	Y
FS004	1	12	41.1	Large	PC	Pure	MN	Deceased	Euthanasia	Neoplasia	152	4	3	3	2	2	1	1	1	4	4	1	1	1	0	0	3	Y
FS006	1	10	38.2	Large	PC	Mix	MN	Living	N/A	N/A	183	5	3	3	1	4	0	1	0	1	7	0	1	1	0	0	2	N
FS007	5	11	29.5	Large	PC	Mix	MN	Living	N/A	N/A	183	5	3	3	1	2	1	1	1	7	7	1	1	1	1	0	4	Y
FS008	5	11	18.2	Med	PC	Mix	MN	Living	N/A	N/A	183	7	2	2	1	0	1	0	0	3	5	0	0	1	0	0	1	N
FS009	1	14	16.5	Med	PC	Mix	FS	Living	N/A	N/A	183	4	3	3	1	2	2	2	1	1	5	1	1	1	0	0	3	Y
FS010	1	16	3.5	Small	PC	Pure	FS	Deceased	Euthanasia	Mobility	154	3	1	3	1	3	2	1	2	4	5	1	1	1	0	0	3	Y
FS011	4	11	33.7	Large	PC	Pure	MN	Living	N/A	N/A	183	7	2	2	1	0	0	0	1	1	7	0	0	1	0	0	1	N
FS012	5	14	34.6	Large	PC	Pure	FS	Living	N/A	N/A	183	5	3	2	2	2	2	1	2	5	3	1	1	0	0	0	2	N
FS013	2	11	4.7	Small	PC	Pure	FS	Living	N/A	N/A	183	5	3	3	1	1	0	0	0	3	7	0	0	1	0	0	1	N
FS014	3	12	23.3	Med	PC	Pure	FS	Living	N/A	N/A	183	5	3	2	2	1	1	1	0	3	5	0	0	0	0	0	0	N
FS017	2	10	36.8	Large	PC	Pure	MN	Living	N/A	N/A	183	6	2	2	1	3	0	1	0	7	7	0	1	1	1	0	3	Y
FS018	4	11	9.2	Small	PC	Pure	MN	Living	N/A	N/A	183	4	3	2	1	1	1	0	0	0	7	0	0	0	0	0	0	N
FS020	4	10	29.4	Large	PC	Pure	MN	Living	N/A	N/A	183	4	3	2	1	2	2	1	0	2	6	1	1	0	0	0	2	N
FS022	1	12	14.6	Small	IM	Pure	MN	Living	N/A	N/A	183	6	2	2	1	1	0	0	0	4	5	0	0	1	0	0	1	N
FS023	5	14	15.1	Med	Onc	Mix	FS	Living	N/A	N/A	183	5	3	7	1	2	2	2	1	3	3	1	1	1	0	0	3	Y
FS024	5	15	9.7	Small	Onc	Pure	MN	Living	N/A	N/A	183	3	1	4	2	0	3	3	3	4	0	1	0	1	0	1	3	Y
FS025	3	10	9	Small	Cardio	Pure	FS	Living	N/A	N/A	183	4	3	2	2	4	2	1	2	5	1	1	1	0	0	1	3	Y
FS026	3	12	24.9	Large	PC	Pure	FS	Living	N/A	N/A	183	4	3	2	1	2	3	2	2	6	2	1	1	0	0	1	3	Y
FS027	1	10	19.4	Med	PC	Mix	MN	Living	N/A	N/A	183	5	3	2	1	1	2	0	1	0	7	1	0	0	0	0	1	N
FS028	3	11	35.9	Large	PC	Mix	MN	Living	N/A	N/A	183	5	3	2	1	1	1	2	0	6	4	1	0	0	0	0	1	N
FS029	2	10	6.9	Small	Cardio	Pure	MN	Living	N/A	N/A	183	5	3	2	1	1	2	2	2	1	6	1	0	0	0	0	1	N
FS030	3	13	5.5	Small	Cardio	Pure	MN	Living	N/A	N/A	183	5	3	3	1	2	1	2	2	1	3	1	1	1	0	0	3	Y
FS031	3	15	5.7	Small	PC	Pure	FS	Living	N/A	N/A	183	5	3	2	1	2	1	2	1	1	7	1	1	0	0	0	2	N
FS033	5	11	25.6	Large	IM	Pure	MN	Living	N/A	N/A	183	5	3	2	2	1	2	1	1	5	7	1	0	0	0	0	1	N
FS034	3	11	5.3	Small	IM	Pure	FS	Living	N/A	N/A	183	7	2	2	2	2	1	1	1	1	7	1	1	1	0	0	3	Y
FS035	3	11	6.6	Small	PC	Mix	MN	Living	N/A	N/A	183	5	3	2	1	2	3	2	3	6	4	1	1	0	0	0	2	N
FS036	5	14	9.3	Small	PC	Mix	FS	Deceased	Euthanasia	Neoplasia	43	6	2	7	1	1	2	1	2	2	7	1	0	1	0	0	2	N
FS037	5	12	30.1	Large	PC	Mix	FS	Living	N/A	N/A	183	5	3	2	1	0	1	1	1	1	7	1	0	0	0	0	1	N
FS038	4	12	12	Small	PC	Mix	FS	Living	N/A	N/A	183	6	2	2	1	0	3	2	2	2	7	1	0	1	0	0	2	N
FS039	1	11	23.3	Med	PC	Mix	MN	Living	N/A	N/A	183	5	3	2	1	0	0	0	1	4	1	0	0	0	0	1	1	N
FS040	5	12	11.6	Small	PC	Pure	MN	Living	N/A	N/A	183	5	3	2	1	2	2	2	2	3	2	1	1	0	0	1	3	Y
FS041	3	11	35.4	Large	PC	Pure	MN	Deceased	Euthanasia	Mobility	3	7	2	2	2	4	2	2	2	7	3	1	1	1	1	0	4	Y
FS042	5	11	7.3	Small	PC	Mix	MN	Living	N/A	N/A	183	5	3	2	1	2	2	0	1	4	7	1	1	0	0	0	2	N
FS043	2	15	10	Small	Behave	Mix	FS	Living	N/A	N/A	183	5	3	7	1	3	1	1	1	1	6	1	1	1	0	0	3	Y
FS044	4	12	10.1	Small	PC	Mix	FS	Living	N/A	N/A	183	5	3	2	1	0	1	1	0	1	5	0	0	0	0	0	0	N
FS045	1	12	2.7	Small	Cardio	Pure	MN	Living	N/A	N/A	183	3	1	3	1	0	1	1	1	0	7	1	0	1	0	0	2	N
FS046	3	13	4.15	Small	Cardio	Pure	FS	Living	N/A	N/A	183	5	3	3	1	1	2	2	3	0	7	1	0	1	0	0	2	N
FS047	3	11	27.1	Large	IM	Mix	MN	Living	N/A	N/A	183	4	3	2	2	3	3	2	3	2	2	1	1	0	0	1	3	Y
FS048	5	13	7.4	Small	PC	Mix	MN	Living	N/A	N/A	183	5	3	2	1	0	1	1	1	0	7	1	0	0	0	0	1	N
FS049	4	14	21.9	Med	PC	Mix	MN	Living	N/A	N/A	183	6	2	2	1	1	2	1	2	2	5	1	0	1	0	0	2	N
FS050	3	12	21	Med	Cardio	Mix	FS	Living	N/A	N/A	183	5	3	2	1	0	1	1	1	0	4	1	0	0	0	0	1	N
FS051	5	10	7.9	Small	IM	Mix	FS	Living	N/A	N/A	183	6	2	2	1	3	1	1	0	0	7	0	1	1	0	0	2	N
FS052	4	16	7.1	Small	IM	Pure	MN	Living	N/A	N/A	183	5	3	2	1	2	3	2	3	4	3	1	1	0	0	0	2	N
FS053	5	11	12	Small	Cardio	Mix	FS	Deceased	Euthanasia	CHF	122	3	1	7	1	4	3	2	2	3	7	1	1	1	0	0	3	Y
FS054	3	13	3.69	Small	Cardio	Pure	FS	Living	N/A	N/A	183	3	1	2	1	3	3	3	3	5	7	1	1	1	0	0	3	Y
FS055	4	12	48	Large	IM	Mix	MN	Living	N/A	N/A	183	6	2	2	1	4	1	1	2	7	3	1	1	1	1	0	4	Y
FS056	3	15	9.6	Small	Onc	Pure	MN	Living	N/A	N/A	183	7	2	4	2	3	2	2	2	3	4	1	1	1	0	0	3	Y
FS057	3	10	21.3	Med	PC	Mix	FS	Living	N/A	N/A	183	6	2	2	1	0	1	1	1	6	6	1	0	1	0	0	2	N
FS058	2	12	4.3	Small	PC	Pure	FS	Living	N/A	N/A	183	5	3	2	1	2	2	0	1	1	5	1	1	0	0	0	2	N
FS060	5	11	22.8	Med	IM	Pure	FS	Living	N/A	N/A	183	7	2	7	1	2	0	1	1	6	5	0	1	1	0	0	2	N
FS061	4	11	9.5	Small	Onc	Mix	MN	Living	N/A	N/A	183	7	2	2	1	1	0	0	0	0	2	0	0	1	0	1	2	N
FS062	1	12	8.1	Small	IM	Mix	MN	Deceased	Unknown	Unknown	28	6	2	7	3	1	1	1	1	1	1	1	0	1	0	1	3	Y
FS063	1	15	6.7	Small	Cardio	Pure	MN	Living	N/A	N/A	183	5	3	5	2	4	3	3	3	2	3	1	1	1	0	0	3	Y
FS064	2	12	25.3	Large	IM	Mix	FS	Living	N/A	N/A	183	5	3	2	1	1	0	0	1	5	7	0	0	0	0	0	0	N
FS065	1	15	1.67	Small	IM	Pure	FS	Living	N/A	N/A	183	4	3	2	1	3	3	3	3	5	3	1	1	0	0	0	2	N
FS066	5	15	11.7	Small	IM	Mix	FS	Living	N/A	N/A	183	7	2	7	3	1	1	1	1	1	0	1	0	1	0	1	3	Y
FS067	4	12	6.4	Small	PC	Pure	FS	Living	N/A	N/A	183	5	3	2	1	1	0	0	1	0	7	0	0	0	0	0	0	N
FS068	2	10	20.4	Med	IM	Mix	FS	Living	N/A	N/A	183	2	1	2	1	1	3	3	3	1	4	1	0	1	0	0	2	N
FS069	4	13	9.7	Small	Cardio	Pure	FS	Living	N/A	N/A	183	6	2	2	1	1	0	1	0	1	7	0	0	1	0	0	1	N
FS070	4	14	8.7	Small	Cardio	Pure	MN	Deceased	Euthanasia	CHF	1	3	1	2	2	2	3	3	3	0	7	1	1	1	0	0	3	Y
FS071	4	13	5.62	Small	Cardio	Mix	FS	Living	N/A	N/A	183	6	2	7	1	2	0	2	1	4	6	1	1	1	0	0	3	Y
FS072	2	13	27.2	Large	Cardio	Mix	FS	Deceased	Euthanasia	CHF	5	6	2	2	1	3	1	2	2	1	4	1	1	1	0	0	3	Y
FS073	5	14	6.8	Small	Neuro	Mix	FS	Living	N/A	N/A	183	5	3	2	2	0	0	0	0	0	7	0	0	0	0	0	0	N
FS074	2	11	10.9	Small	Cardio	Pure	MN	Deceased	Euthanasia	CHF	73	5	3	2	1	2	1	1	1	1	4	1	1	0	0	0	2	N
FS075	2	13	19.3	Med	Onc	Mix	MN	Living	N/A	N/A	183	4	3	2	1	0	1	2	2	2	4	1	0	0	0	0	1	N
FS076	5	12	3.17	Small	Cardio	Pure	MN	Living	N/A	N/A	183	6	2	2	1	1	1	1	0	0	7	0	0	1	0	0	1	N
FS077	1	11	4.4	Small	IM	Pure	FS	Deceased	Natural	PLE	100	4	3	7	1	4	3	3	3	0	7	1	1	1	0	0	3	Y
FS078	5	13	13.7	Small	IM	Mix	FS	Deceased	Euthanasia	Inappetence	42	3	1	3	2	2	3	3	3	5	0	1	1	1	0	1	4	Y
FS079	5	12	4.48	Small	Cardio	Mix	FS	Living	N/A	N/A	183	5	3	7	1	2	1	1	0	0	7	0	1	1	0	0	2	N
FS081	2	12	3.78	Small	Onc	Pure	MN	Deceased	Euthanasia	Pain	9	3	1	2	2	3	2	2	2	3	1	1	1	1	0	1	4	Y
FS082	4	13	6.2	Small	IM	Pure	MN	Living	N/A	N/A	183	6	2	2	1	1	2	3	2	0	7	1	0	1	0	0	2	N
FS083	3	15	7	Small	Neuro	Pure	MN	Deceased	Natural	Unknown	30	2	1	4	2	4	3	3	3	7	0	1	1	1	1	1	5	Y
FS084	2	10	12	Small	IM	Pure	MN	Living	N/A	N/A	183	4	3	2	1	2	1	2	3	0	7	1	1	0	0	0	2	N
FS085	4	15	5.3	Small	Cardio	Pure	MN	Living	N/A	N/A	183	5	3	2	1	0	1	1	1	2	0	1	0	0	0	1	2	N
FS086	5	15	2.28	Small	IM	Pure	FS	Living	N/A	N/A	183	4	3	2	1	1	3	3	3	4	7	1	0	0	0	0	1	N
FS087	5	11	30.5	Large	Cardio	Mix	FS	Living	N/A	N/A	183	5	3	2	1	1	1	1	1	1	7	1	0	0	0	0	1	N
FS088	5	12	27.5	Large	Neuro	Mix	MN	Living	N/A	N/A	183	7	2	7	2	2	3	3	3	4	0	1	1	1	0	1	4	Y
FS089	1	11	15.3	Med	Cardio	Pure	MN	Deceased	Euthanasia	CHF	26	4	3	4	2	2	2	1	2	2	2	1	1	1	0	1	4	Y
FS090	1	15	2.61	Small	IM	Pure	MN	Living	N/A	N/A	183	3	1	4	3	4	3	3	3	7	1	1	1	1	1	1	5	Y
FS091	3	14	7.1	Small	IM	Pure	MN	Living	N/A	N/A	183	3	1	3	2	1	3	3	3	4	4	1	0	1	0	0	2	N
FS092	5	11	11	Small	IM	Pure	MN	Deceased	Euthanasia	CHF	32	6	2	2	1	3	3	2	2	2	0	1	1	1	0	1	4	Y
FS093	2	11		Small	Cardio	Mix	MN	Living	N/A	N/A	183	6	2	2	1	0	0	1	1	2	7	0	0	1	0	0	1	N
FS094	1	14	14	Small	Cardio	Mix	MN	Living	N/A	N/A	183	6	2	2	1	1	1	1	1	1	7	1	0	1	0	0	2	N
FS095	2	16	15.5	Med	IM	Mix	FS	Deceased	Euthanasia	Inappetence	113	4	3	3	3	4	3	2	3	7	0	1	1	1	1	1	5	Y
FS096	3	11	12.8	Small	Cardio	Pure	MN	Living	N/A	N/A	183	8	2	2	1	1	1	2	1	4	6	1	0	1	0	0	2	N
FS097	2	11	8.67	Small	PC	Pure	MN	Living	N/A	N/A	183	7	2	2	1	1	1	0	1	0	7	0	0	1	0	0	1	N
FS098	2	11	23.6	Med	Onc	Mix	MI	Living	N/A	N/A	183	5	3	2	1	2	1	1	1	1	7	1	1	0	0	0	2	N
FS099	4	10	33.3	Large	Onc	Pure	FI	Living	N/A	N/A	183	6	2	4	2	2	0	1	1	2	1	0	1	1	0	1	3	Y
FS100	1	11	4.17	Small	IM	Pure	MN	Living	N/A	N/A	183	5	3	2	1	3	1	1	0	0	4	0	1	0	0	0	1	N
FS101	4	12	28	Large	IM	Mix	FS	Living	N/A	N/A	183	9	2	2	1	2	1	2	0	4	7	1	1	1	0	0	3	Y
FS102	2	12	22.4	Med	Onc	Mix	FS	Deceased	Euthanasia	Neoplasia	148	6	2	7	1	0	2	1	0	3	7	1	0	1	0	0	2	N
FS103	4	12	28.5	Large	Onc	Mix	MN	Living	N/A	N/A	183	6	2	2	1	1	0	0	0	2	7	0	0	1	0	0	1	N
FS104	1	12	37.6	Large	Onc	Pure	FS	Deceased	Euthanasia	Neoplasia	24	7	2	2	1	2	1	1	1	2	5	1	1	1	0	0	3	Y
FS105	4	14	2.75	Small	Cardio	Pure	MN	Living	N/A	N/A	183	5	3	2	1	1	1	1	0	1	7	0	0	0	0	0	0	N
FS106	5	12	38.2	Large	Onc	Mix	MN	Deceased	Euthanasia	Respiratory	45	5	3	4	3	4	0	2	3	7	0	1	1	1	1	1	5	Y
FS107	4	10	25.9	Large	Onc	Pure	FS	Living	N/A	N/A	183	5	3	2	1	2	2	1	0	0	5	1	1	0	0	0	2	N
FS108	3	12	25.1	Large	Onc	Pure	MN	Deceased	Euthanasia	Respiratory	57	7	2	2	1	1	1	0	0	0	7	0	0	1	0	0	1	N
FS109	3	10	40.8	Large	IM	Pure	MI	Living	N/A	N/A	183	8	2	3	1	1	1	2	1	3	5	1	0	1	0	0	2	N
FS110	2	11	26.1	Large	Onc	Pure	FS	Living	N/A	N/A	183	5	3	2	1	0	1	1	1	0	7	1	0	0	0	0	1	N
FS111	2	13	12.2	Small	PC	Mix	MN	Living	N/A	N/A	183	6	2	2	1	0	0	0	0	6	5	0	0	1	0	0	1	N
FS113	3	11	26.1	Large	Neuro	Mix	FS	Living	N/A	N/A	183	5	3	2	1	0	1	1	1	0	7	1	0	0	0	0	1	N
FS114	2	12	19.3	Med	Onc	Pure	MN	Living	N/A	N/A	183	6	2	3	1	2	1	1	1	3	5	1	1	1	0	0	3	Y
FS115	1	10	25	Large	Onc	Mix	MI	Living	N/A	N/A	183	4	3	3	1	1	1	1	1	3	3	1	0	1	0	0	2	N
FS117	1	11	47.4	Large	Cardio	Pure	FS	Deceased	Natural	Neoplasia	38	6	2	7	1	1	1	1	1	3	2	1	0	1	0	1	3	Y
FS118	3	11	11.5	Small	PC	Pure	MN	Living	N/A	N/A	183	4	3	2	1	0	2	2	2	0	7	1	0	0	0	0	1	N
FS119	1	13	28.4	Large	Onc	Mix	FS	Deceased	Euthanasia	Neoplasia	131	6	2	2	1	0	2	1	2	0	7	1	0	1	0	0	2	N
FS120	4	11	8.1	Small	Cardio	Pure	FS	Deceased	Euthanasia	Mobility	49	7	2	2	1	2	2	2	1	3	7	1	1	1	0	0	3	Y
FS121	2	15	7.5	Small	Cardio	Pure	MN	Deceased	Euthanasia	CHF	136	3	1	3	3	1	2	2	3	2	0	1	0	1	0	1	3	Y
FS122	3	11	5.65	Small	Cardio	Mix	FS	Living	N/A	N/A	183	6	2	2	1	0	1	1	0	1	7	0	0	1	0	0	1	N
FS123	3	14	26.7	Large	Rehab	Mix	FS	Living	N/A	N/A	183	5	3	2	3	3	1	3	3	7	0	1	1	0	1	1	4	Y
FS124	1	12	34.2	Large	Onc	Pure	FS	Living	N/A	N/A	183	6	2	2	1	0	1	2	1	0	7	1	0	1	0	0	2	N
FS125	2	10	25.7	Large	Onc	Mix	FS	Living	N/A	N/A	183	5	3	7	1	0	1	1	2	0	7	1	0	1	0	0	2	N
FS126	1	12	6.3	Small	Cardio	Pure	MN	Deceased	Natural	CHF	71	5	3	2	1	3	2	2	2	0	3	1	1	0	0	0	2	N
FS127	4	11	4.4	Small	Rehab	Mix	MI	Living	N/A	N/A	183	4	3	2	1	0	3	3	3	3	7	1	0	0	0	0	1	N
FS128	4	11	6.1	Small	Cardio	Mix	MN	Living	N/A	N/A	183	2	1	7	1	3	3	3	3	5	5	1	1	1	0	0	3	Y
FS129	2	14	24	Med	IM	Mix	MN	Living	N/A	N/A	183	5	3	7	2	1	2	3	3	7	3	1	0	1	1	0	3	Y
FS130	3	10	32.2	Large	Onc	Pure	FS	Living	N/A	N/A	183	5	3	2	1	0	0	0	1	0	4	0	0	0	0	0	0	N
FS132	5	12	23.4	Med	Rehab	Pure	FS	Living	N/A	N/A	183	3	1	7	2	1	2	2	3	5	2	1	0	1	0	1	3	Y
FS133	4	11	20.5	Med	Onc	Mix	FS	Deceased	Euthanasia	Inappetence	176	5	3	2	1	3	1	1	1	4	7	1	1	0	0	0	2	N
FS134	2	12	23.7	Med	Onc	Pure	FS	Deceased	Euthanasia	Seizures	87	3	1	2	1	2	2	1	3	1	2	1	1	1	0	1	4	Y
FS135	2	13	30.8	Large	Onc	Mix	MN	Living	N/A	N/A	183	5	3	2	2	1	1	1	0	5	3	0	0	0	0	0	0	N
FS136	1	11	24.3	Med	Cardio	Pure	MN	Deceased	Euthanasia	CHF	62	6	2	7	1	2	1	2	0	3	7	1	1	1	0	0	3	Y
FS138	3	10	11	Small	Onc	Pure	FS	Deceased	Euthanasia	Neoplasia	97	6	2	2	1	1	1	1	0	0	7	0	0	1	0	0	1	N
FS139	4	16	9.7	Small	Cardio	Mix	MN	Living	N/A	N/A	183	5	3	4	2	1	3	3	2	4	4	1	0	1	0	0	2	N
FS140	3	10	13.7	Small	PC	Pure	MN	Living	N/A	N/A	183	7	2	2	1	1	1	0	0	0	7	0	0	1	0	0	1	N
FS142	3	12	13	Small	Onc	Pure	MN	Deceased	Euthanasia	Neoplasia	171	5	3	7	1	0	2	2	2	7	6	1	0	1	1	0	3	Y
FS112	1	12	29	Large	Onc	Mix	FS	Deceased	Unknown	Unknown	74	7	2	7	1	3	1	0	1	2	6	0	1	1	0	0	2	N
FS141	1	10	2.56	Small	IM	Pure	MN	Living	N/A	N/A	183	6	2	2	1	0	3	3	1	0	7	1	0	1	0	0	2	N
FS143	2	11	22.9	Med	IM	Mix	FS	Living	N/A	N/A	183	5	3	2	1	2	2	1	2	0	7	1	1	0	0	0	2	N
FS144	4	11	20.9	Med	Onc	Pure	FS	Living	N/A	N/A	183	8	2	2	2	4	0	0	1	1	3	0	1	1	0	0	2	N
FS146	2	11	29.1	Large	Rehab	Pure	FS	Living	N/A	N/A	183	6	2	2	1	3	1	2	2	5	5	1	1	1	0	0	3	Y
FS147	1	12	4.5	Small	IM	Pure	FS	Living	N/A	N/A	183	5	3	2	1	0	1	3	2	2	7	1	0	0	0	0	1	N
FS148	4	12	23.3	Med	Onc	Mix	MN	Deceased	Euthanasia	Inappetence	7	7	2	2	2	3	2	2	1	6	0	1	1	1	0	1	4	Y
FS149	2	12	23.4	Med	IM	Pure	MN	Deceased	Euthanasia	CHF	100	5	3	2	1	2	0	0	0	5	5	0	1	0	0	0	1	N
FS150	5	12	5.8	Small	IM	Mix	MN	Living	N/A	N/A	183	5	3	2	1	0	0	1	0	3	7	0	0	0	0	0	0	N
FS152	5	11	29.5	Large	Onc	Mix	FS	Deceased	Euthanasia	Neoplasia	123	7	2	7	1	2	1	2	1	5	7	1	1	1	0	0	3	Y
FS153	2	15	10	Small	Cardio	Pure	MN	Deceased	Euthanasia	Renal Failure	31	4	3	2	2	1	1	2	1	2	2	1	0	0	0	1	2	N
FS154	5	11	3.12	Small	IM	Pure	FS	Living	N/A	N/A	183	9	2	4	1	4	0	2	1	1	3	1	1	1	0	0	3	Y
FS155	4	10	43	Large	Onc	Pure	MN	Deceased	Natural	Foreign Body	33	6	2	2	1	2	2	2	1	7	7	1	1	1	1	0	4	Y
FS156	1	12	39	Large	Onc	Mix	MN	Deceased	Euthanasia	Neoplasia	179	6	2	2	1	2	0	1	2	1	7	1	1	1	0	0	3	Y
FS157	3	14	30.5	Large	Onc	Mix	MN	Deceased	Euthanasia	Neoplasia	54	7	2	7	3	4	1	1	1	7	0	1	1	1	1	1	5	Y
FS158	3	14	28.8	Large	Onc	Mix	FS	Deceased	Natural	Neoplasia	60	6	2	7	1	2	1	1	0	2	5	0	1	1	0	0	2	N
FS159	2	12	24.6	Med	Neuro	Mix	FS	Living	N/A	N/A	183	5	3	2	1	1	0	0	1	0	7	0	0	0	0	0	0	N
FS160	5	16	5.37	Small	Cardio	Pure	FS	Deceased	Natural	CHF	81	5	3	2	1	2	2	2	3	0	7	1	1	0	0	0	2	N
FS161	1	13	19.1	Med	Onc	Mix	FS	Living	N/A	N/A	183	6	2	4	1	2	0	1	0	1	7	0	1	1	0	0	2	N
FS162	3	12	7.4	Small	IM	Pure	FS	Deceased	Euthanasia	Neoplasia	146	4	3	4	1	1	2	3	2	7	4	1	0	1	1	0	3	Y
FS163	1	14	26.4	Large	PC	Mix	MN	Deceased	Euthanasia	Neoplasia	69	6	2	2	1	3	2	2	2	7	7	1	1	1	1	0	4	Y
FS164	3	13	39.5	Large	Cardio	Pure	FS	Living	N/A	N/A	183	4	3	2	1	4	3	3	3	7	7	1	1	0	1	0	3	Y
FS165	1	11	26.5	Large	Onc	Pure	MN	Living	N/A	N/A	183	5	3	2	1	2	2	2	1	1	7	1	1	0	0	0	2	N
FS166	1	12	15.6	Med	Onc	Pure	FS	Deceased	Euthanasia	Unknown	154	6	2	3	1	1	1	1	1	1	5	1	0	1	0	0	2	N
FS167	1	10	39.9	Large	Onc	Pure	MN	Deceased	Euthanasia	Mobility	154	7	2	2	1	3	1	1	1	0	7	1	1	1	0	0	3	Y
FS168	2	12	26.7	Large	Onc	Mix	FS	Living	N/A	N/A	183	6	2	3	2	3	1	0	0	5	3	0	1	1	0	0	2	N
FS169	3	11	4.17	Small	IM	Mix	FS	Living	N/A	N/A	183	5	3	2	1	2	0	0	1	1	3	0	1	0	0	0	1	N
FS170	4	11	22.1	Med	Onc	Mix	FS	Living	N/A	N/A	183	6	2	2	1	0	1	0	0	0	7	0	0	1	0	0	1	N
FS171	2	13	8.3	Small	IM	Mix	FS	Living	N/A	N/A	183	7	2	2	1	2	1	2	0	2	6	1	1	1	0	0	3	Y
FS172	4	10	25.4	Large	Onc	Pure	FS	Living	N/A	N/A	183	4	3	2	1	2	3	2	3	1	5	1	1	0	0	0	2	N
FS173	2	15	3.86	Small	IM	Pure	FS	Living	N/A	N/A	183	7	2	2	1	1	0	2	3	0	7	1	0	1	0	0	2	N
FS174	2	14	26.2	Large	Onc	Mix	FS	Living	N/A	N/A	183	5	3	2	1	0	3	2	2	3	4	1	0	0	0	0	1	N
FS175	2	10	19.2	Med	Onc	Mix	MN	Living	N/A	N/A	183	3	1	2	2	1	3	2	3	4	7	1	0	1	0	0	2	N
FS177	3	13	30.2	Large	Neuro	Mix	MN	Deceased	Euthanasia	Mobility	156	6	2	2	3	1	1	2	2	7	0	1	0	1	1	1	4	Y
FS178	1	11	45.1	Large	Onc	Pure	FS	Deceased	Euthanasia	Neoplasia	16	5	3	2	2	3	0	1	3	7	2	1	1	0	1	1	4	Y
FS181	3	12	17	Med	Cardio	Pure	FS	Living	N/A	N/A	183	6	2	2	2	2	0	1	1	6	4	0	1	1	0	0	2	N
FS182	5	12	25.6	Large	Cardio	Pure	MN	Deceased	Euthanasia	Mobility	119	6	2	7	1	2	2	2	2	7	0	1	1	1	1	1	5	Y
FS183	2	12	40.5	Large	Cardio	Mix	FS	Living	N/A	N/A	183	5	3	2	3	2	0	1	1	5	2	0	1	0	0	1	2	N
FS184	4	12	6.8	Small	Onc	Pure	FS	Deceased	Euthanasia	Neoplasia	50	6	2	2	1	1	1	1	0	1	0	0	0	1	0	1	2	N
FS185	4	13	2.1	Small	Neuro	Pure	FS	Deceased	Euthanasia	Respiratory	146	5	3	3	2	4	1	2	1	2	1	1	1	1	0	1	4	Y
FS186	5	12	44.9	Large	Neuro	Pure	FS	Deceased	Euthanasia	Neoplasia	3	8	2	2	2	4	1	2	2	7	0	1	1	1	1	1	5	Y
FS187	1	11	18	Med	Onc	Pure	MN	Deceased	Euthanasia	Inappetance	178	7	2	7	2	1	1	2	2	1	2	1	0	1	0	1	3	Y
FS188	4	12	41.1	Large	Cardio	Pure	MN	Living	N/A	N/A	183	6	2	2	1	0	2	1	2	3	4	1	0	1	0	0	2	N
FS189	4	16	7.2	Small	Cardio	Pure	MN	Living	N/A	N/A	183	4	3	3	1	0	3	1	3	1	5	1	0	1	0	0	2	N
FS190	5	12	22.9	Med	Cardio	Pure	FS	Living	N/A	N/A	183	5	3	2	1	2	2	2	1	0	7	1	1	0	0	0	2	N
FS191	5	12	5.25	Small	Cardio	Pure	MI	Living	N/A	N/A	183	6	2	3	1	0	0	1	1	0	3	0	0	1	0	0	1	N
FS192	2	14	7.3	Small	Onc	Mix	FS	Living	N/A	N/A	183	4	3	3	1	0	1	2	1	0	7	1	0	1	0	0	2	N
FS193	5	13	32	Large	IM	Mix	FS	Living	N/A	N/A	183	7	2	2	2	3	1	1	1	6	2	1	1	1	0	1	4	Y
FS194	2	11	7.01	Small	IM	Pure	MN	Deceased	Euthanasia	Renal Failure	166	5	3	4	4	3	2	2	2	7	1	1	1	1	1	1	5	Y
FS196	1	12	6.1	Small	Neuro	Pure	FS	Living	N/A	N/A	183	6	2	2	1	2	1	0	1	0	7	0	1	1	0	0	2	N
FS197	1	10	14	Small	IM	Pure	FS	Living	N/A	N/A	183	5	3	2	1	2	2	2	2	5	7	1	1	0	0	0	2	N
FS198	1	15	1.6	Small	PC	Pure	MN	Deceased	Natural	Renal Failure	98	1	1	5	3	4	3	3	3	6	1	1	1	1	0	1	4	Y
FS199	1	11	27	Large	Cardio	Mix	FS	Living	N/A	N/A	183	5	3	2	1	2	0	0	0	3	5	0	1	0	0	0	1	N
FS200	2	12	26.6	Large	Cardio	Mix	MN	Living	N/A	N/A	183	6	2	2	1	4	1	1	2	1	2	1	1	1	0	1	4	Y
FS201	5	10	33.2	Large	Onc	Pure	MN	Living	N/A	N/A	183	5	3	2	2	0	1	0	0	6	2	0	0	0	0	1	1	N
FS202	1	11	25.6	Large	Onc	Pure	FS	Living	N/A	N/A	183	5	3	2	1	0	1	1	1	0	7	1	0	0	0	0	1	N
FS203	5	16	5.5	Small	PC	Mix	MN	Living	N/A	N/A	183	2	1	2	1	2	3	3	3	6	4	1	1	1	0	0	3	Y
FS204	3	13	12.4	Small	Cardio	Pure	MN	Living	N/A	N/A	183	6	2	2	1	1	1	1	2	0	6	1	0	1	0	0	2	N
FS205	3	11	18	Med	Cardio	Mix	FS	Living	N/A	N/A	183	6	2	2	2	3	1	2	2	0	2	1	1	1	0	1	4	Y
FS206	4	14	7.7	Small	Cardio	Pure	FS	Deceased	Euthanasia	Respiratory	69	6	2	4	1	4	1	1	1	2	3	1	1	1	0	0	3	Y
FS207	3	16	4.85	Small	Neuro	Pure	MN	Living	N/A	N/A	183	5	3	2	2	2	2	2	1	6	0	1	1	0	0	1	3	Y
FS208	4	10	31.5	Large	Onc	Pure	FS	Living	N/A	N/A	183	6	2	2	2	3	0	0	1	4	0	0	1	1	0	1	3	Y
FS209	4	13	15.7	Med	Cardio	Mix	FS	Living	N/A	N/A	183	9	2	7	2	2	2	2	1	3	2	1	1	1	0	1	4	Y
FS210	5	11	54	Large	IM	Mix	MN	Living	N/A	N/A	183	6	2	2	1	2	1	2	2	1	7	1	1	1	0	0	3	Y
FS211	4	15	7.9	Small	IM	Pure	MN	Deceased	Euthanasia	Seizures	43	7	2	2	2	4	1	2	1	7	0	1	1	1	1	1	5	Y
FS212	2	13	9.7	Small	Neuro	Mix	MN	Living	N/A	N/A	183	6	2	2	1	2	1	0	2	3	6	1	1	1	0	0	3	Y
FS213	5	10	67	Large	Cardio	Pure	FS	Living	N/A	N/A	183	7	2	2	1	3	1	2	2	1	7	1	1	1	0	0	3	Y
FS214	4	10	23.9	Med	IM	Pure	FS	Living	N/A	N/A	183	6	2	2	1	0	1	0	1	0	7	0	0	1	0	0	1	N
FS215	1	10	7.2	Small	IM	Mix	MN	Living	N/A	N/A	183	5	3	2	1	1	1	0	2	0	7	1	0	0	0	0	1	N
